# Supplementary material for: Rituximab added to conditioning regimen significantly improves erythroid engraftment in major incompatible ABO-group hematopoietic stem cell transplantation
Source: Research Square preprint supplement (doi:10.21203/rs.3.rs-3579616/v1), 2023-11-14
Supplement: Supplementary file 1 [file 123cbc6ba1071671236a29fb.docx]

**SUPPLEMENTARY**

**GVHD prophylaxis**

GVHD prophylaxis included anti-thymocyte globulin (ATG), Ciclosporin-A (CSA), and Methotrexate for transplant from a matched unrelated donor and one antigen mismatched related donor. For the matched related donors, GVHD prophylaxis was performed with CSA and Methotrexate when the stem cell source was bone marrow, and ATG was added when the stem cell source was peripheral blood. In the case of a related haploidentical donor, GVHD prophylaxis included post-transplant Cyclophosphamide (PTCy) at 50 mg/kg/day on days 3 and 4 after allo-HCT, CSA from day +5, and mofetil mycophenolate from day +5 until day +35 after transplant.

**Engraftment Definitions and Transfusion Policy**

Neutrophil engraftment was defined as the first of 3 consecutive days with an absolute neutrophil count higher than 0.5 × 109/L. Platelet engraftment was defined as the first of 3 consecutive days with a sustained platelet count higher than >20 × 109/L platelets. Patients were defined as transfusion-independent when they did not receive any transfusion for at least three months17.

Primary graft failure was defined as ANC <0.5 × 109/L by day +28 after transplant, hemoglobin <80 g/L, and platelets <20 × 109/L, with confirmation of donor cell origin required for RIC regimen transplant. Secondary graft failure was defined as ANC <0.5 × 109/L after initial engraftment not related to relapse, infection, or drug toxicity. For RIC transplant, requires the loss of donor hematopoiesis to < 5%18.

Poor graft function was defined as two or three cytopenias lasting for more than 2 weeks, after day +28 and in the presence of donor chimerism >95%.

Monitoring of cytomegalovirus (CMV) infection was performed by detection of CMV-DNA on peripheral blood two times weekly until day +100 after transplant, and then on a patient-based schedule. CMV reactivation was defined as detection of CMV-DNA ≥1000 copies/ml. CMV reactivation was treated with pre-emptive therapy according to current guidelines19. None of the patients received Letermovir as CMV-reactivation prophylaxis since it was not available yet during the observation time of the study.

Major ABO incompatibility was defined as recipient 0 / donor A, B, or AB; recipient A/donor AB; recipient B/ donor AB; bidirectional incompatibility was defined as recipient A/donor B; recipient B / donor A.

The hemoglobin threshold for red blood cell transfusion was 80 g/L. Patients with cardiac comorbidities or symptomatic dyspnea were transfused to keep hemoglobin level > 90 g/L. All blood components were white blood cell-depleted and irradiated. The blood group choice for transfusions was made according to the published standard recommendation for transfusions in ABO-incompatible HSCT18.

Pure red cell aplasia (PRCA) was defined as anemia, reticulocytopenia, and red blood cell transfusion dependence together with bone marrow aspirate or biopsy showing isolated depletion or nearly depletion of erythroid precursors in otherwise normal marrow3.
